# Supplementary material for: Assessing Stress Induced by Fluid Shifts and Reduced Cerebral Clearance during Robotic-Assisted Laparoscopic Radical Prostatectomy under Trendelenburg Positioning (UroTreND Study)
Source: MDPI journal article supplement (doi:10.3390/mps7020031), 2024-04-01
Supplement: s1 [file s1]

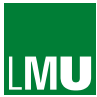

## Current Stress Test (CST)

Code-No. (to be filled in by the investigator):

---

Please mark each question with a cross to indicate how you feel at the moment.

Mark each question with just one cross.

EXAMPLE:

*At the moment* I feel/I am

|                | very                     | quite                    | rather                   | rather                              | quite                               | very                     |           |
|----------------|--------------------------|--------------------------|--------------------------|-------------------------------------|-------------------------------------|--------------------------|-----------|
| fresh          | <input type="checkbox"/> | <input type="checkbox"/> | <input type="checkbox"/> | <input checked="" type="checkbox"/> | <input type="checkbox"/>            | <input type="checkbox"/> | dull      |
| full of energy | <input type="checkbox"/> | <input type="checkbox"/> | <input type="checkbox"/> | <input type="checkbox"/>            | <input checked="" type="checkbox"/> | <input type="checkbox"/> | powerless |

---

*At the moment* I feel/I am

|             | very                     | quite                    | rather                   | rather                   | quite                    | very                     |           |
|-------------|--------------------------|--------------------------|--------------------------|--------------------------|--------------------------|--------------------------|-----------|
| tense       | <input type="checkbox"/> | composed  |
| relaxed     | <input type="checkbox"/> | anxious   |
| concerned   | <input type="checkbox"/> | carefree  |
| calm        | <input type="checkbox"/> | restless  |
| skeptical   | <input type="checkbox"/> | confident |
| comfortable | <input type="checkbox"/> | unwell    |
